# Supplementary material
Source: Springer Nature journal article supplement (https://www.springermedizin.de/resource/supplementary/12889_2011_3301_MOESM6_ESM.pdf/9488644)

# Counts Per Minute

8000  
7000  
6000  
5000  
4000  
3000  
2000  
1000  
0

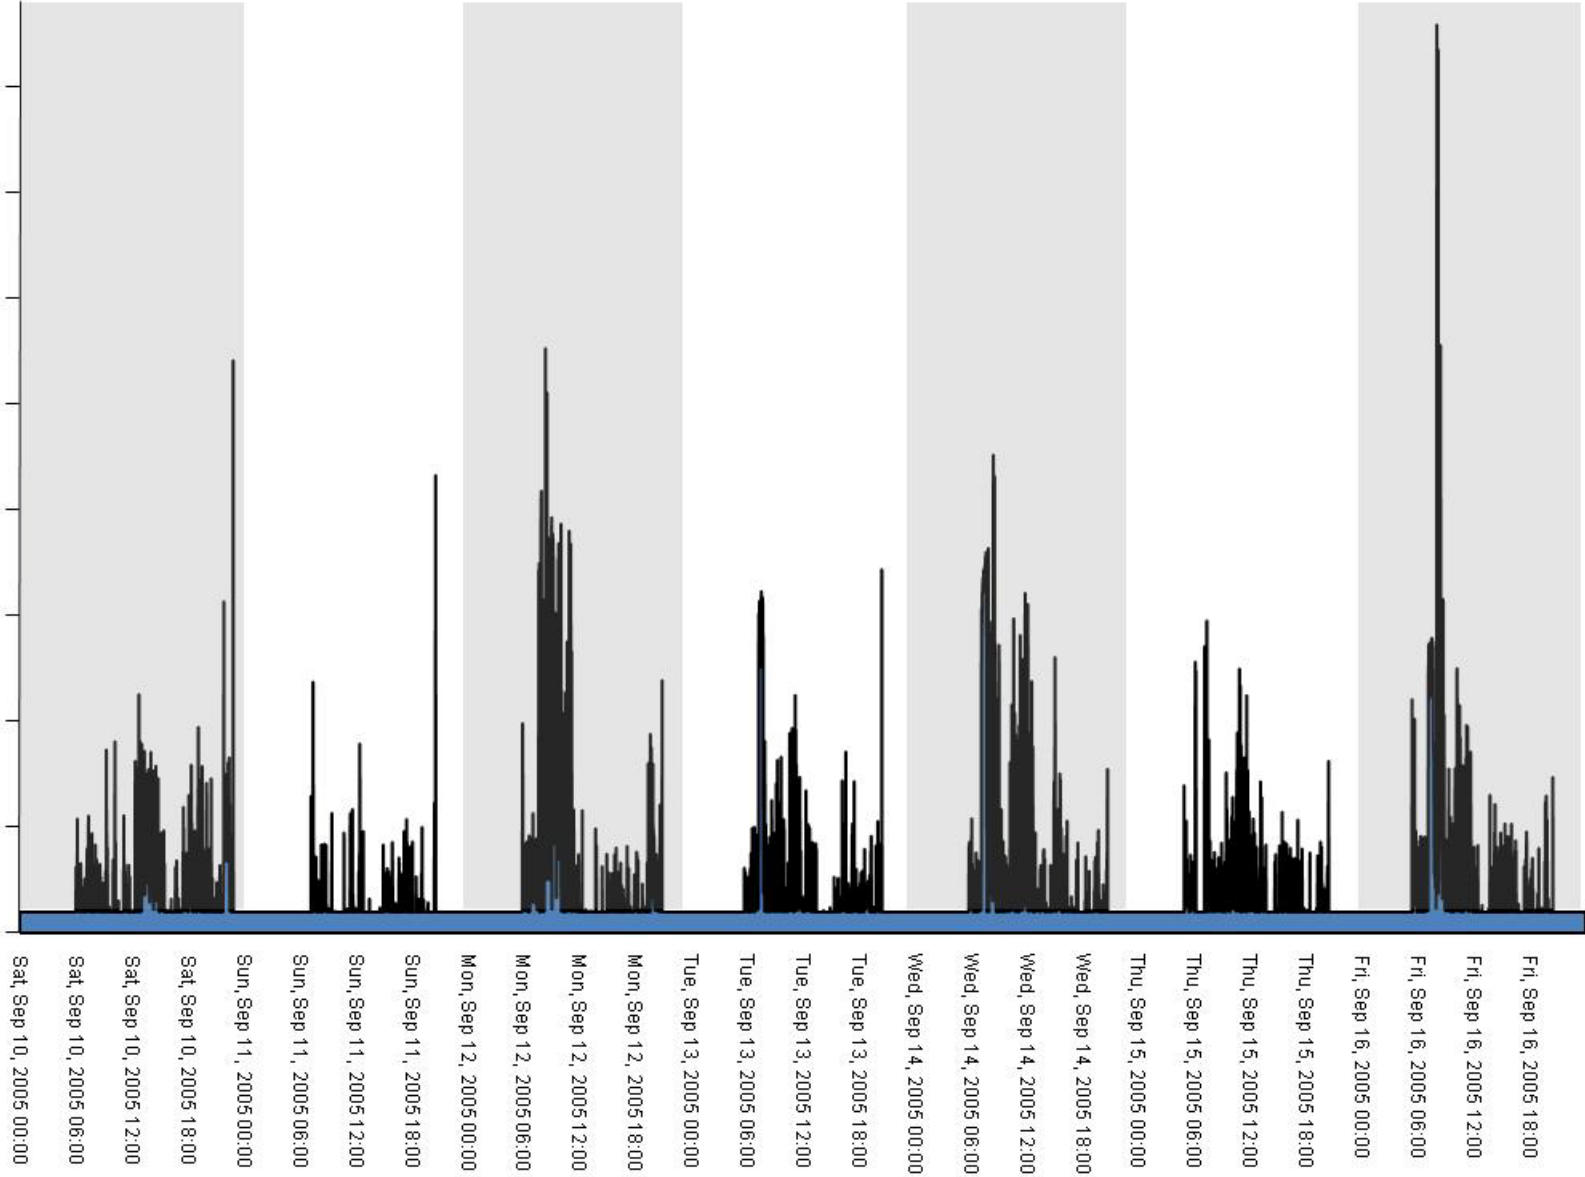

Supplement: MOESM6 [file 9488644]
